# Supplementary material for: Psychological Distress in South African Healthcare Workers Early in the COVID-19 Pandemic: An Analysis of Associations and Mitigating Factors
Source: MDPI journal article supplement (doi:10.3390/ijerph19159722), 2022-08-07
Supplement: s1 [file s1]

**Table S1.** Association between psychological distress and training, support, or appreciation.

| Items                                                                                                             | Psychological Distress |                    | P                 | Effect Size<br>g |
|-------------------------------------------------------------------------------------------------------------------|------------------------|--------------------|-------------------|------------------|
|                                                                                                                   | Yes                    | No                 |                   |                  |
| <b>Training<sup>a</sup></b>                                                                                       | <b>Mean (SD)</b>       | <b>Mean (SD)</b>   |                   |                  |
| <b>7. Emergency procedures (evacuation)</b>                                                                       | <b>1.58 (0.74)</b>     | <b>2.08 (0.80)</b> | <b>&lt;0.001*</b> | <b>0.650</b>     |
| <b>5. COVID-19 infection control</b>                                                                              | <b>1.84 (0.61)</b>     | <b>2.16 (0.51)</b> | <b>0.003*</b>     | <b>0.561</b>     |
| 6. Ventilation requirements                                                                                       | 1.58 (0.77)            | 1.82 (0.79)        | 0.104             |                  |
| 4. General infection control                                                                                      | 1.87 (0.54)            | 2.00 (0.49)        | 0.166             |                  |
| 3. Doffing of PPE                                                                                                 | 1.90 (0.60)            | 1.98 (0.52)        | 0.446             |                  |
| 2. Donning of PPE                                                                                                 | 1.93 (0.58)            | 1.98 (0.47)        | 0.595             |                  |
| 1. Hand hygiene                                                                                                   | 1.99 (0.40)            | 2.02 (0.37)        | 0.637             |                  |
| Average score of 7 items <sup>c</sup>                                                                             | 1.18 (0.41)            | 2.00 (0.35)        | 0.009*            | 0.488            |
| <b>Social Support<sup>b</sup></b>                                                                                 |                        |                    |                   |                  |
| <b>1. How much can each of these people be relied upon to help and support you when things get tough at work?</b> |                        |                    |                   |                  |
| <b>1.1. Your immediate supervisor/boss</b>                                                                        | <b>2.78 (1.06)</b>     | <b>3.27 (0.75)</b> | <b>0.003*</b>     | <b>-0.521</b>    |
| 1.2. Your colleague(s)                                                                                            | 3.07 (0.88)            | 3.14 (0.83)        | 0.683             |                  |
| 1.3. Your family                                                                                                  | 3.36 (0.82)            | 3.73 (0.70)        | 0.495             |                  |
| 1.4. Your friend(s)                                                                                               | 3.11 (0.88)            | 3.29 (0.78)        | 0.238             |                  |
| 1.5. Your husband/partner                                                                                         | 3.52 (0.94)            | 3.40 (1.07)        | 0.503             |                  |
| Average score of 5 items <sup>c</sup>                                                                             | 3.23 (0.67)            | 3.37 (0.52)        | 0.215             |                  |
| <b>Appreciation</b>                                                                                               |                        |                    |                   |                  |
| <b>2. How often do each of these people let you know that they appreciate the job that you are doing?</b>         |                        |                    |                   |                  |
| 2.1. Your immediate supervisor/boss                                                                               | 2.77 (1.01)            | 3.00 (0.94)        | 0.236             |                  |
| 2.2. Your colleague(s)                                                                                            | 2.77 (1.06)            | 2.94 (0.8)         | 0.321             |                  |
| 2.3. Your family                                                                                                  | 3.49 (0.86)            | 3.47 (0.81)        | 0.924             |                  |
| 2.4. Your friend(s)                                                                                               | 3.10 (0.93)            | 3.16 (0.93)        | 0.743             |                  |
| 2.5. Your husband/partner                                                                                         | 3.48 (0.95)            | 3.44 (0.92)        | 0.841             |                  |
| Average score of 5 items <sup>c</sup>                                                                             | 3.11 (0.74)            | 3.21 (0.62)        | 0.443             |                  |

Note: <sup>a</sup> Scores from 'not received' to 'would like more training', score 1 to 3; <sup>b</sup> Scores from 'Not at all' to 'Extremely often', score 1-4; \* P < 0.05; <sup>c</sup> At least two items answered.

**Table S2.** Correlations matrix between variables with significant correlation with psychological distress.

|                                                           | 1              | 2              | 3               | 4               | 5               | 6              | 7               | 8              | 9               | 10              | 11 |
|-----------------------------------------------------------|----------------|----------------|-----------------|-----------------|-----------------|----------------|-----------------|----------------|-----------------|-----------------|----|
| 1. Training: COVID-19 infection control                   | 1              |                |                 |                 |                 |                |                 |                |                 |                 |    |
| 2. Training: Emergency Procedures                         | <b>.187*</b>   | 1              |                 |                 |                 |                |                 |                |                 |                 |    |
| 3. JRTI                                                   | 0.038          | <b>-.195*</b>  | 1               |                 |                 |                |                 |                |                 |                 |    |
| 4. Perceived risks of COVID-19                            | -0.147         | -0.138         | <b>0.509**</b>  | 1               |                 |                |                 |                |                 |                 |    |
| 5. Social support: immediate supervisor/boss              | 0.123          | 0.158          | <b>-0.320**</b> | <b>-0.247**</b> | 1               |                |                 |                |                 |                 |    |
| 6. Workplace hazards: hazardous in general                | 0.088          | 0.103          | <b>-0.251**</b> | <b>-0.330**</b> | 0.143           | 1              |                 |                |                 |                 |    |
| 7. Workplace hazards: hazardous since the pandemic        | 0.031          | 0.214*         | -0.170          | <b>-0.231*</b>  | -0.005          | <b>0.455**</b> | 1               |                |                 |                 |    |
| 8. Compliance: protective practices – COVID-19            | <b>0.218**</b> | 0.072          | 0.032           | -0.002          | 0.048           | 0.123          | 0.132           | 1              |                 |                 |    |
| 9. Compliance: protective practices - Non-COVID-19        | <b>0.194*</b>  | 0.114          | 0.003           | -0.065          | <b>0.221*</b>   | 0.144          | 0.141           | <b>0.631**</b> | 1               |                 |    |
| 10: Workplace relationship                                | <b>0.204*</b>  | <b>0.252**</b> | -0.175          | -0.148          | <b>0.365**</b>  | <b>0.188*</b>  | <b>0.197*</b>   | <b>0.599**</b> | <b>0.519**</b>  | 1               |    |
| 11. Perception of barriers to infection control practices | -0.129         | -0.181         | 0.138           | <b>0.228*</b>   | <b>-0.319**</b> | <b>-0.224*</b> | <b>-0.266**</b> | -0.170         | <b>-0.267**</b> | <b>-0.370**</b> | 1  |

Note: \* Pearson's correlation coefficient is significant at the 0.05 level (2-tailed); \*\* Pearson's correlation coefficient is significant at the 0.01 level (2-tailed).

**Table S3.** Results for mediation analysis with psychological distress as a dependent variable and perceived risks of COVID-19 as a mediator.

| Antecedent                      | Consequent                                                   |      |        |                     |      |       |
|---------------------------------|--------------------------------------------------------------|------|--------|---------------------|------|-------|
|                                 | M (Perceived risks)                                          |      |        | Y (PD)              |      |       |
|                                 | Coefficient $\beta$                                          | SE   | P      | Coefficient $\beta$ | SE   | P     |
| X (JRTI)                        | 0.56                                                         | 0.11 | 0.00** | 0.49                | 0.32 | 0.13  |
| M (Perceived risks)             |                                                              |      |        | 0.51                | 0.24 | 0.03* |
| Direct effect (X --> Y)         | Effect: 0.49; SE: 0.32; P = 0.13                             |      |        |                     |      |       |
| Indirect effect (X --> M --> Y) | Effect: 0.29; BootSE: 0.14; BootCI (0.04, 0.61) <sup>a</sup> |      |        |                     |      |       |

Note: The above results are expressed in a log-odds metric; X: predictor; Y: dependent variable; M: mediator; SE: standard error; BootSE: bootstrap SE; BootCI: bootstrap confidence interval; Covariates: immediate supervisor/boss support and concern about the hazardous workplace in general; \* P < 0.05; \*\* P < 0.01; <sup>a</sup>Statistically significant.

**Table S4.** Results from a regression analysis examining the moderation effect of 'workplace relationship' on 'compliance with protective practices for COVID-19 and Non-COVID-19 patients' to 'psychological distress.'

| Variables                                                                   | Coefficient $\beta$                    | SE   | P       |
|-----------------------------------------------------------------------------|----------------------------------------|------|---------|
| <b>Psychological Distress (Y)</b>                                           |                                        |      |         |
| Compliance COVID-19 (X1)                                                    | 0.04                                   | 0.41 | 0.928   |
| Workplace Relationship (W)                                                  | -0.98                                  | 0.41 | 0.017*  |
| Compliance COVID-19 x Workplace Relationship (X1*W)                         | -0.79                                  | 0.29 | 0.007** |
| Likelihood ratio test of the highest order unconditional interactions X1*W: | Chi-square: 7.81; df = 1; P = 0.005**  |      |         |
| <b>Psychological Distress (Y)</b>                                           |                                        |      |         |
| Compliance Non-COVID-19 (X2)                                                | 0.25                                   | 0.34 | 0.46    |
| Workplace Relationship (W)                                                  | -0.93                                  | 0.42 | 0.025*  |
| Compliance Non-COVID-19 x Workplace Relationship (X2*W)                     | -0.99                                  | 0.31 | 0.001** |
| Likelihood ratio test of the highest order unconditional interactions X2*W: | Chi-square: 11.10; df = 1; P = 0.001** |      |         |

Note: The above results are expressed in a log-odds metric; X1 & X2: predictors; Y: dependent variable; W: moderator; SE: standard error; Covariates: Compliance with protective practices for COVID-19 or Non-COVID-19 patients, immediate supervisor/boss support and perceived barriers to infection control; \* P < 0.05; \*\* P < 0.01.

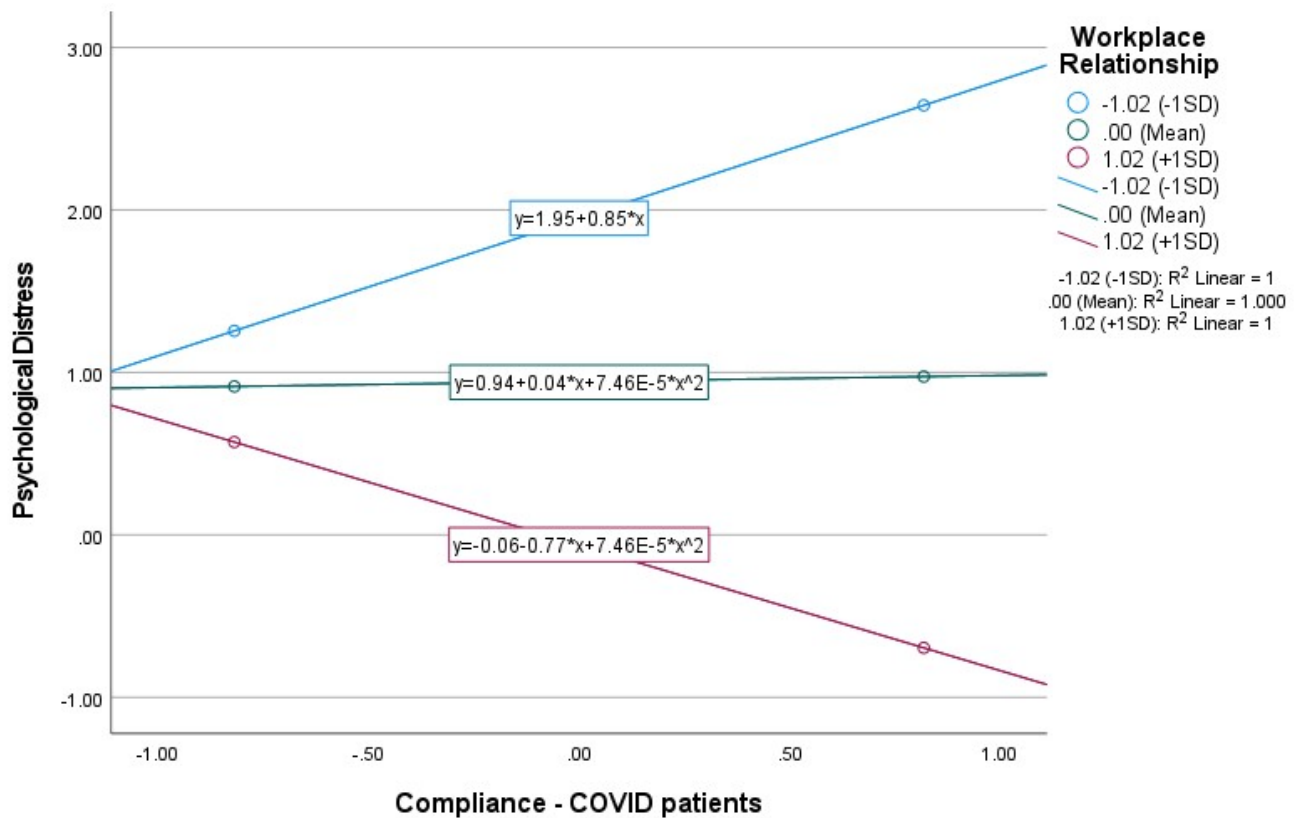

Note: SD: Standard Deviation; Compliance–COVID-19 Patients: compliance with protective practices for COVID-19 patient care.

**Figure S1.** Visualization of the conditional effect of the predictor (Compliance–COVID-19 patients) at values of the moderator (Workplace Relationship) when the Workplace Relationship mean score is at 1 SD below the mean, mean, and 1 SD above the mean value.

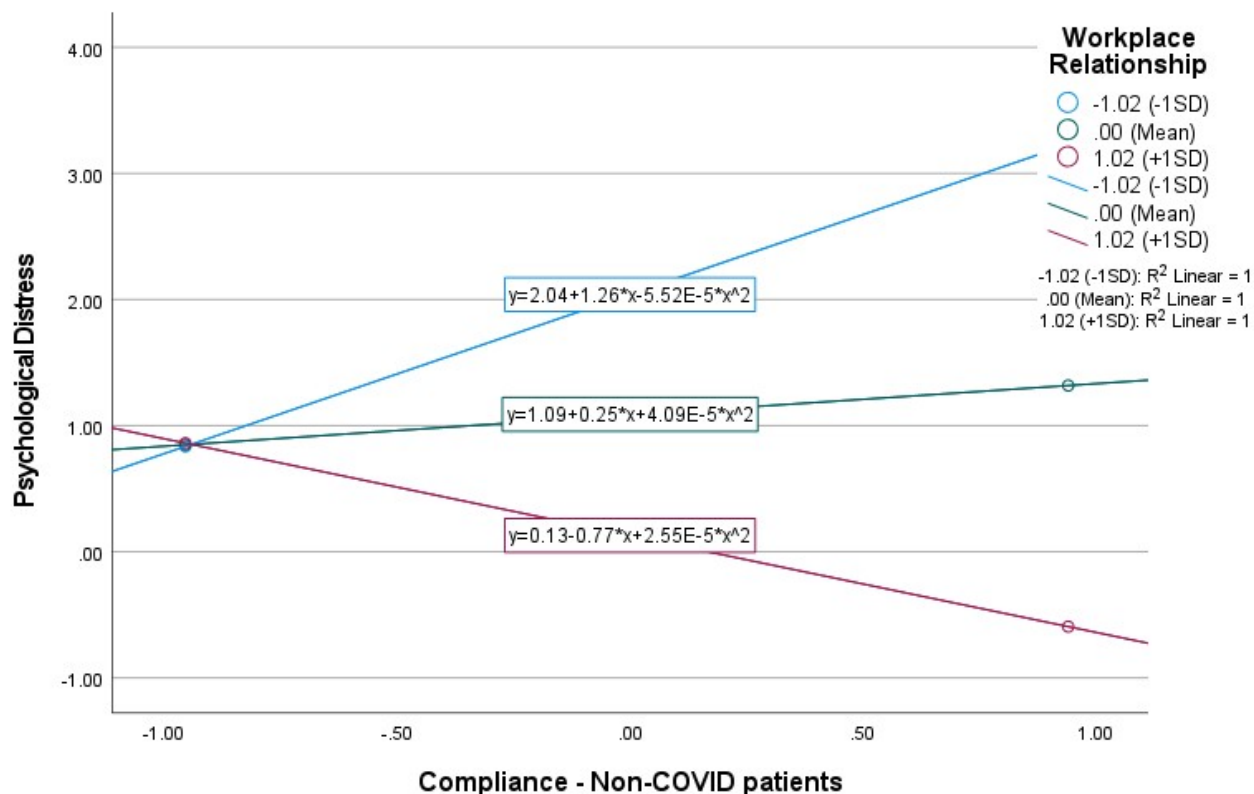

Note: SD: Standard Deviation; Compliance–Non-COVID-19 Patients: compliance with protective practices for Non-COVID-19 patient care.

**Figure S2.** Visualization of the conditional effect of the predictor (Compliance–Non-COVID-19 patients) at values of the moderator (Workplace Relationship) when the Workplace Relationship mean score is at 1 SD below the mean, and 1 SD above the mean value.

STROBE Statement—Checklist of items that should be included in reports of *cross-sectional studies*

| Checklist of items that should be included in reports of cross-sectional studies |         |                                                                                                     |         |
|----------------------------------------------------------------------------------|---------|-----------------------------------------------------------------------------------------------------|---------|
|                                                                                  | Item No | Recommendation                                                                                      | Page No |
| Title and abstract                                                               | 1       | (a) Indicate the study's design with a commonly used term in the title or the abstract              | 1       |
|                                                                                  |         | (b) Provide in the abstract an informative and balanced summary of what was done and what was found | 1       |
| Introduction                                                                     |         |                                                                                                     |         |
| Background/rationale                                                             | 2       | Explain the scientific background and rationale for the investigation being reported                | 1-2     |
| Objectives                                                                       | 3       | State specific objectives, including any prespecified hypotheses                                    | 2       |
| Methods                                                                          |         |                                                                                                     |         |

|                           |     |                                                                                                                                                                                                                |      |
|---------------------------|-----|----------------------------------------------------------------------------------------------------------------------------------------------------------------------------------------------------------------|------|
| Study design              | 4   | Present key elements of study design early in the paper                                                                                                                                                        | 3    |
| Setting                   | 5   | Describe the setting, locations, and relevant dates, including periods of recruitment, exposure, follow-up, and data collection                                                                                | 3    |
| Participants              | 6   | (a) Give the eligibility criteria, and the sources and methods of selection of participants                                                                                                                    | 3    |
| Variables                 | 7   | Clearly define all outcomes, exposures, predictors, potential confounders, and effect modifiers. Give diagnostic criteria, if applicable                                                                       | 3-4  |
| Data sources/ measurement | 8*  | For each variable of interest, give sources of data and details of methods of assessment (measurement). Describe comparability of assessment methods if there is more than one group                           | 4-5  |
| Bias                      | 9   | Describe any efforts to address potential sources of bias                                                                                                                                                      | 19   |
| Study size                | 10  | Explain how the study size was arrived at                                                                                                                                                                      | 6    |
| Quantitative variables    | 11  | Explain how quantitative variables were handled in the analyses. If applicable, describe which groupings were chosen and why                                                                                   | 4-5  |
| Statistical methods       | 12  | (a) Describe all statistical methods, including those used to control for confounding                                                                                                                          | 5    |
|                           |     | (b) Describe any methods used to examine subgroups and interactions                                                                                                                                            | 5    |
|                           |     | (c) Explain how missing data were addressed                                                                                                                                                                    | 5    |
|                           |     | (d) If applicable, describe analytical methods taking account of sampling strategy                                                                                                                             | 5    |
|                           |     | (e) Describe any sensitivity analyses                                                                                                                                                                          | 5    |
| <b>Results</b>            |     |                                                                                                                                                                                                                |      |
| Participants              | 13* | (a) Report numbers of individuals at each stage of study—e.g., numbers potentially eligible, examined for eligibility, confirmed eligible, included in the study, completing follow-up, and analysed           | 6    |
|                           |     | (b) Give reasons for non-participation at each stage                                                                                                                                                           | 6    |
|                           |     | (c) Consider use of a flow diagram                                                                                                                                                                             | n/a  |
| Descriptive data          | 14* | (a) Give characteristics of study participants (e.g., demographic, clinical, social) and information on exposures and potential confounders                                                                    | 6-7  |
|                           |     | (b) Indicate number of participants with missing data for each variable of interest                                                                                                                            | 6-7  |
| Outcome data              | 15* | Report numbers of outcome events or summary measures                                                                                                                                                           | 7-15 |
| Main results              | 16  | (a) Give unadjusted estimates and, if applicable, confounder-adjusted estimates and their precision (e.g., 95% confidence interval). Make clear which confounders were adjusted for and why they were included | 7-15 |
|                           |     | (b) Report category boundaries when continuous variables were categorized                                                                                                                                      | 7-15 |
|                           |     | (c) If relevant, consider translating estimates of relative risk into absolute risk for a meaningful time period                                                                                               | n/a  |

|                          |    |                                                                                                                                                                            |       |
|--------------------------|----|----------------------------------------------------------------------------------------------------------------------------------------------------------------------------|-------|
| Other analyses           | 17 | Report other analyses done—e.g., analyses of subgroups and interactions, and sensitivity analyses                                                                          | 13-15 |
| <b>Discussion</b>        |    |                                                                                                                                                                            |       |
| Key results              | 18 | Summarise key results with reference to study objectives                                                                                                                   | 15-18 |
| Limitations              | 19 | Discuss limitations of the study, taking into account sources of potential bias or imprecision. Discuss both direction and magnitude of any potential bias                 | 19    |
| Interpretation           | 20 | Give a cautious overall interpretation of results considering objectives, limitations, multiplicity of analyses, results from similar studies, and other relevant evidence | 15-18 |
| Generalisability         | 21 | Discuss the generalisability (external validity) of the study results                                                                                                      | 19    |
| <b>Other information</b> |    |                                                                                                                                                                            |       |
| Funding                  | 22 | Give the source of funding and the role of the funders for the present study and, if applicable, for the original study on which the present article is based              | 20    |

\*Give information separately for exposed and unexposed groups.

**Note:** An Explanation and Elaboration article discusses each checklist item and gives methodological background and published examples of transparent reporting. The STROBE checklist is best used in conjunction with this article (freely available on the Web sites of PLoS Medicine at <http://www.plosmedicine.org/>, Annals of Internal Medicine at <http://www.annals.org/>, and Epidemiology at <http://www.epidem.com/>). Information on the STROBE Initiative is available at [www.strobe-statement.org](http://www.strobe-statement.org).
